# Supplementary material for: miR-196b-5p Regulates Colorectal Cancer Cell Migration and Metastases through Interaction with HOXB7 and GALNT5
Source: Oxford University Press journal article supplement (doi:10.1158/1078-0432.ccr-17-0023), 2017-05-22
Supplement: 10780432ccr170023-sup-176639_2_supp_4028110_1ppbvt.docx [file 10780432ccr170023-sup-176639_2_supp_4028110_1ppbvt.docx]

**Supplementary Tables**

**Supplementary Table 1:** Primer sequences used for qRT PCR analysis

GAPDH_fw AAGGTCGGAGTCAACGGATTT

GAPDH_rev ACCAGAGTTAAA AGCAGCCCTG

B2M_fw TGCTGTCTCCATGTTTGATGTATCT

B2M_rev TCTCTGCTCCCCACCTCTAAGT

GALNT5_fw TTGGAACATACGACCCTGGC

GALNT5_rev CACCACACATCCACACCTTG

HOXB7_fw TTCCTTCAACATGCACTGCG

HOXB7_rev TCAGTTCCTGAGCTTCGCAT

CPA4_fw AGGACCTGCAGATTTACCACG

CPA_rev GGGAGATCCACTCTCGGGAA

MUC13_fw GCTGTAACCAGACTGCGGAT

MUC13_rev TTGAGACTGGAAGCAACGCA

DKK1_fw TGACAACTACCAGCCGTACC

DKK1_rev CAGGCGAGACAGATTTGCAC

KRTAP2-3_fw AGCTGATCCTCAAGCACGAA

KRTAP2-3_rev GGGTGATGAGTCAGTGGGAC

KRTAP3-1_fw CTGCTGCAAGCCTGATACCT

KRTAP3-1_rev GGTTGATCCCACTCAGTCCG

Cyclin D1_fw TGCCAACCTCCTCAACGAC

Cyclin D1_rev TCTGTTCCTCGCAGACCT CC

CDKN1B_fw TAATTGGGGCTCCGGCT AAC

CDKN1B_rev GAAGAATCGTCGGTTGCAGGT

GATA6_fw GAAGCGCGTGCCTTCATCA

GATA6_rev CTGCGCCATAAGGTGGTAGT

HOXA9_fw AAAAACAACCCAGCGAAGGC

HOXA9_rev GGGTTATTGGGATCGATGGGG

HOXB7_fw (human specific) TGGGAACTGAATCAGGAAACTCA

HOXB7_rev (human specific) CCAAAATTTCTCCTTTCT CCCTCC

GALNT5_fw (human specific) TCATCCAGAACTGGTGAATCACAT

GALNT5_rev (human specific) TGGGTCACAGGCAGCTACT

**Supplementary Table 2;** Summary and comparison of clinico-pathological characteristics of the colorectal cancer patients in cohort 1 (n = 110) and cohort 2 (n = 182).

|  |  | Cohort 1 (n=110) | Cohort 2 (n=182) | p-value |
| --- | --- | --- | --- | --- |
|  |  | No (%) | No (%) |
| Age | median | 62 | 64 | P<0.05* |
| minimum | 31 | 30 |
| maximum | 80 | 92 |
| Sex | female | 40 (36.4) | 83 (45.6) | P<0.05** |
| male | 70 (63.4) | 99 (54.6) |
| Stage | stage II | 11 (10) | 71 (39) | P<0.05** |
| stage III | 40 (36.4) | 51 (28) |
| stage IV | 59 (53.6) | 60 (31) |
|  |  | GX 4 (2.2) |
| Grading | G1 | 2 (1.8) | 45 (24.7) | P<0.05** |
| G2 | 81 (73.6) | 98 (53.8) |
| G3+G4 | 27 (36.4) | 35 (19.2) |

*Mann-Whitney-Wilcoxon test
**chi-square test

**Supplementary table 3** Univariate analysis of clinico-pathological parameters for the prediction of 5-years overall survival in patients with colorectal cancer in cohort 1 (n=110) and cohort 2 (n=182).

| Parameter | Univariate analysis | | | |
| --- | --- | --- | --- | --- |
|  | **Cohort 1** | | **Cohort 2** | |
| **HR (95% CI)** | ***p*-value** | **HR (95% CI)** | ***p*-value** |
| Age at diagnosis (years; continuous) | 1.02 (0.99-1.04) | 0.230 | 1.001 (0.98-1.02) | 0.772 |
| Gender  Male  Female | 1 (reference)  0.88 (0.52-1.48) | 0.635 | 1 (reference)  0.69 (0.42-1.13) | 0.147 |
| Tumor grade  G1+G2  G3+G4 | 1 (reference)  2.58 (1.53-4.37) | <0.001 | 1 (reference)  1.46 (0.83-2.57) | 0.183 |
| Tumor Stage  I-III  IV | 1 (reference)  2.86 (1.67-4.9) | <0.001 | 1 (reference)  7.07 (4.23-11.8) | <0.001 |
| MiR-196b-5p  low  high | 1 (reference)  0.450 (0.268-0.758) | 0.003 | 1 (reference)  0.624 (0.38-0.98) | 0.048 |

**Supplementary Table 4** Multivariate analysis of clinico-pathological parameters for the prediction of 5-years overall survival in patients with colorectal cancer in cohort 1 (n=110) and cohort 2 (n=182).

| **Parameter** | **Multivariate analysis** | | | |
| --- | --- | --- | --- | --- |
|  | **Cohort 1** | | **Cohort 2** | |
| **HR (95% CI)** | ***p*-value** | **HR (95% CI)** | ***p*-value** |
| **Age at diagnosis** (years; continuous**)** | 1.01 (0.98-1.04) | 0.312 | 1.02 (0.99-1.05) | 0.115 |
| **Gender**  Male  Female | 1 (reference)  1.07 (0.62-1.84) | 0.793 | 1 (reference)  0.734 (0.44 – 1.21) | 0.229 |
| **Tumor grade**  G1+G2  G3+G4 | 1 (reference)  2.57 (1.50-4.38) | 0.001 | 1 (reference)  1.38 (0.77-2.46) | 0.274 |
| **Tumor Stage**  I-III  IV | 1 (reference)  2.69 (1.54-4.69) | <0.001 | 1 (reference)  8.92 (5.06-15.7) | <0.001 |
| **MiR-196b-5p**  low  high | 1 (reference)  0.50 (0.29-0.84) | 0.010 | 1 (reference)  1.06 (0.64-1.75) | 0.807 |

**Supplementary table 5:** Up- and downregulated transcripts obtained from a microarray whole transcriptome profiling analysis in three independent biological replicates comparing the HCT116 miR-196b-5p stably overexpressing cells against control cells

| Gene Symbol | Gene Assignment | Fold-Change(miR-196b-5p OE vs. OE Control) |
| --- | --- | --- |
| PRF1 | NM_001083116 | 2,24563 |
| MBNL3 | NM_001170704 | 1,9677 |
| RNU7-55P | ENST00000459426 | 1,95474 |
| HIF1A-AS2 | ENST00000554254 | 1,86226 |
| SAT1 | NM_002970 | 1,79687 |
| METTL7A | NM_014033 | 1,70887 |
| CALCRL | ENST00000409998 | 1,68066 |
| LEMD1 | NM_001001552 | 1,67825 |
| LOC151760 | XR_171398 | 1,66902 |
| PELI2 | NM_021255 | 1,66612 |
| NR2F1 | NM_005654 | 1,66005 |
| B3GALT1 | NM_020981 | 1,64909 |
| GRIN2B | NM_000834 | 1,64811 |
| MAPK8IP1 | NM_005456 | 1,64206 |
| ZNF221 | NM_013359 | 1,62754 |
| IL23A | ENST00000390418 | 1,6275 |
| KLRK1 | ENST00000396451 | 1,62234 |
| TM4SF18 | NM_001184723 | 1,61283 |
| FAT4 | NM_001291285 | 1,60888 |
| OR2A42 | NM_001001802 | 1,607 |
| NFIB | NM_001190737 | 1,59117 |
| TANK | NM_001199135 | 1,59064 |
| ACTR3C | ENST00000478393 | 1,58428 |
| CNTNAP3B | OTTHUMT00000129769 | 1,58131 |
| SESN3 | NM_001271594 | 1,58118 |
| RNA5SP221 | ENST00000411271 | 1,57367 |
| CLCNKB | NM_001165945 | 1,56909 |
| LOC100506127 | ENST00000530460 | 1,5645 |
| TNFSF18 | NM_005092 | 1,56157 |
| SESTD1 | NM_178123 | 1,56049 |
| MIR548I2 | NR_031688 | 1,55382 |
| OR2A1 | NM_001005287 | 1,54072 |
| GRAMD1C | NM_001172105 | 1,53522 |
| PBX1 | NM_001204961 | 1,51931 |
| RNU7-57P | ENST00000459540 | 1,51705 |
| TNRC6C-AS1 | NR_040071 | 1,51501 |
| MIR548I2 | NR_031688 | 1,50798 |
| TAS2R10 | ENST00000240619 | 1,50222 |
| MIR548L | NR_031630 | -1,50385 |
| MIR4486 | NR_039706 | -1,50391 |
| CGN | AF263462 | -1,50964 |
| GSTTP1 | NR_003081 | -1,51934 |
| ZBED2 | ENST00000317012 | -1,52435 |
| RNA5SP361 | ENST00000362686 | -1,53585 |
| RNA5SP409 | ENST00000516815 | -1,53643 |
| RNU4-63P | ENST00000411313 | -1,5407 |
| ZNF804A | NM_194250 | -1,54416 |
| LOC101060542 | NR_110764 | -1,54904 |
| HOXB7 | NM_004502 | -1,55316 |
| IPW | ENST00000547292 | -1,55897 |
| RNA5SP207 | ENST00000390874 | -1,56357 |
| TRGV5 | ENST00000390344 | -1,57482 |
| MIR130B | NR_029845 | -1,58401 |
| CCDC106 | NM_013301 | -1,5897 |
| TXLNGY | ENST00000445715 | -1,59438 |
| MIR544B | NR_036088 | -1,6022 |
| TXLNGY | NR_045128 | -1,60561 |
| LOC101927171 | XR_242040 | -1,61848 |
| LOC100130172 | ENST00000500267 | -1,64255 |
| GAS6-AS2 | NR_044993 | -1,66338 |
| MIR149 | NR_029702 | -1,68 |
| RNU6ATAC18P | ENST00000408413 | -1,70476 |
| ARL14EPL | NM_001195581 | -1,71038 |
| DKK1 | NM_012242 | -1,77465 |
| MUC13 | NM_033049 | -1,80149 |
| KIR2DS1 | NM_014512 | -1,82954 |
| RNU6-736P | ENST00000516436 | -1,83458 |
| TTTY15 | NR_001545 | -1,89931 |
| ANXA10 | NM_007193 | -1,90447 |
| LOC101928687 | NR_120641 | -2,05617 |
| LOC101928102 | XR_248922 | -2,09693 |
| RNA5SP295 | ENST00000362655 | -2,11431 |
| GALNT5 | NM_014568 | -2,13099 |
| RNU6-893P | ENST00000458841 | -2,30349 |
| KRTAP2-3 | NM_001165252 | -2,4029 |
| KRTAP3-1 | NM_031958 | -2,44953 |
| CPA4 | NM_001163446 | -2,60247 |
| DDX3Y | NM_004660 | -2,66755 |
| HIST1H2BB | NM_021062 | -3,05063 |

**Supplementary Table 6:** Down-regulated genes identified in the microarray analysis underwent in silico target prediction analysis according to the details described in the methods section. The table shows only downregulated genes with potentially miR-196b-5p interaction sites.

| **Gene name** | **log2 FoldChange** | **Number of prediction tools that identified a putative target** | **Seed match count in 3'UTR (based on ENSEMBL database)** |
| --- | --- | --- | --- |
| DDX3Y | -2.67 | **2** | 0 |
| CPA4 | -2.6 | **4** | 2 |
| KRTAP3-1 | -2.45 | **2** | 0 |
| KRTAP2-3 | -2.4 | **1** | 0 |
| GALNT5 | -2.13 | **NA** | 2 |
| LOC101928102 | -2.1 | **1** | 0 |
| ANXA10 | -1.9 | **3** | 0 |
| MUC13 | -1.8 | **2** | 0 |
| DKK1 | -1.77 | **3** | 0 |
| ARL14EPL | -1.71 | **1** | 0 |
| HOXB7 | -1.55 | **9** | 2 |
| ZNF804A | -1.54 | **1** | 0 |
| HDGFRP3 | -1.52 | **2** | 0 |
| ZBED2 | -1.52 | **2** | 0 |
| CGN | -1.51 | **4** | 1 |
